# Supplementary material for: Different nanostructured CoP microcubes derived from metal formate frameworks with enhanced oxygen evolution reaction performance
Source: Royal Society of Chemistry journal article supplement (doi:10.1039/d2ce00874b), 2022-01-01
Supplement: d2ce00874b1.pdf [file d2ce00874b1.pdf]

# **Different Nanostructured CoP Microcubes Derived from Metal Formate Frameworks with Enhanced Oxygen Evolution Reaction**

Zhihao Duan<sup>1, a</sup>, Jiahui Jiang<sup>1, b</sup>, Hang Zhao<sup>a</sup>, Qidi Hu<sup>a</sup>, Jian Wan<sup>a</sup>, Jingbo Zhou<sup>a</sup>,  
Weiwei Wang<sup>b</sup>, Li Zhang<sup>a,b\*</sup>,

a. College of Chemical Engineering, Xinjiang University, Urumqi, 830046, Xinjiang,  
PR China.

b. State Key Laboratory of Chemistry and Utilization of Carbon Based Energy  
Resources; College of Chemistry, Xinjiang University, Urumqi, 830046, Xinjiang, PR  
China.

1. Jiahui Jiang and Zhihao Duan contributed equally to this manuscript.

\* Corresponding author

E-mail: zhangli420@xju.edu.cn

**Materials:** Cobalt (II) perchlorate hydrate, Cobalt(II) nitratehexahydrate ( $\text{Co}(\text{NO}_3)_2 \cdot 6\text{H}_2\text{O}$ , 98%) and sodiumhypophosphite ( $\text{NaH}_2\text{PO}_2 \cdot \text{H}_2\text{O}$ , 99%) were provided by Tianjin Yongsheng Fine Chemical Company. Anhydrous ethanol ( $\text{CH}_3\text{CH}_2\text{OH}$ , 99.7 wt%), Formic acid ( $\text{HCOOH}$ , 88wt%) and methylamine water solution ( $\text{CH}_3\text{NH}_2$ , 30wt%) were provided by Tianjin Zhiyuan Chemical Plants. Surfactant polyvinylpyrrolidone K30 (PVP K30) was purchased from Tokyo Chemical Industry Co.,Ltd. All materials were used as purchased without further purification.

**Structural characterizations:** The surfacial morphology and elemental composition of samples were examined by field-emission scanning electron microscopy (FESEM; Hitachi S-4800 microscope) attached with energy dispersive X-ray spectrometry (EDX). Powder X-ray diffraction (PXRD) tested by Bruker D8 advance diffractometer with Cu Ka radiation was used to analyze crystal phase and porous features of products. The Barrett-Emmett-Teller (BET) specific surface area was characterized on the Micromeritics ASAP 2050. Surficial element states was measured using X-ray photoelectron spectroscopy (XPS) performed on Escalab 250 Xi system.

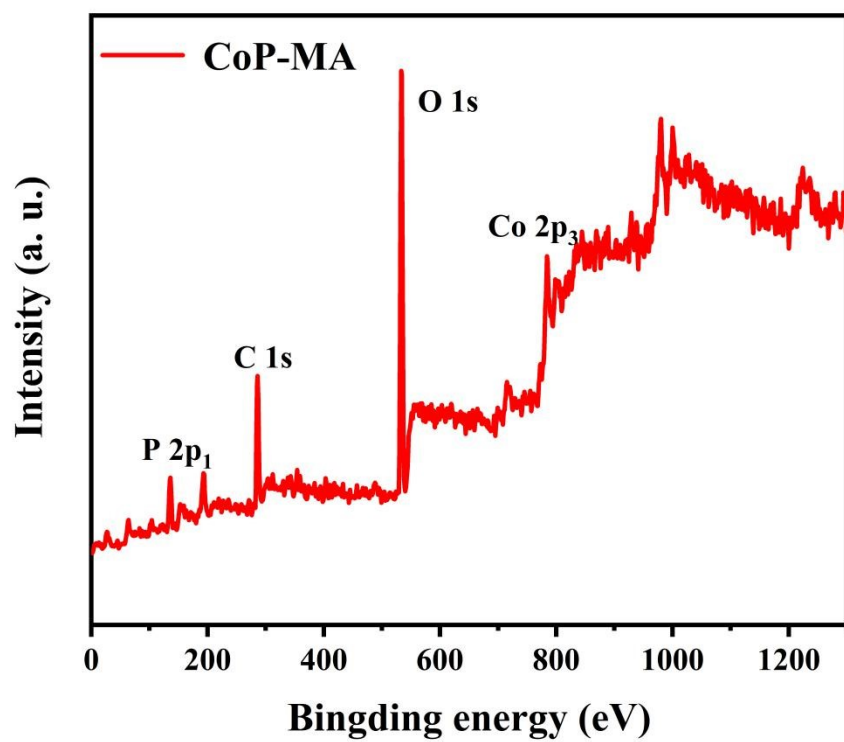

Figure S1. XPS survey spectra of CoP-GC.

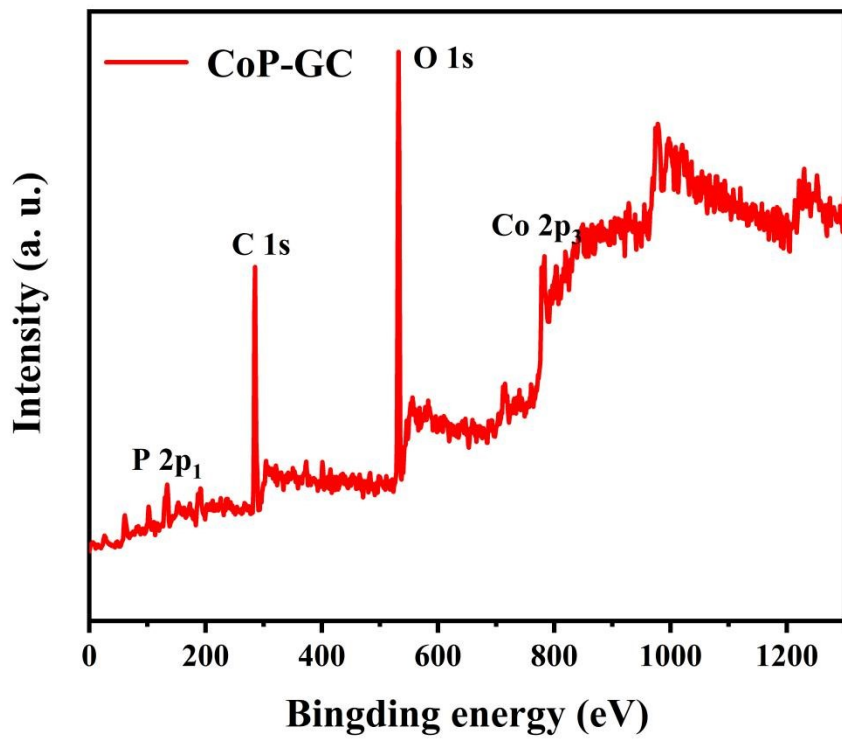

Figure S2. XPS survey spectra of CoP-MA

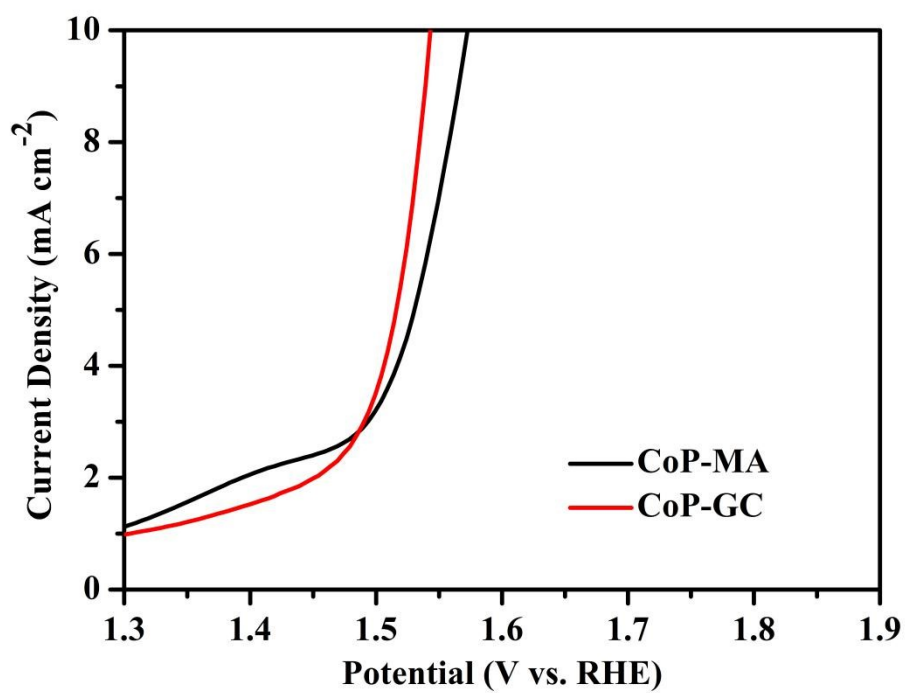

Figure S3. Polarization curves of CoP-MA and CoP-GC

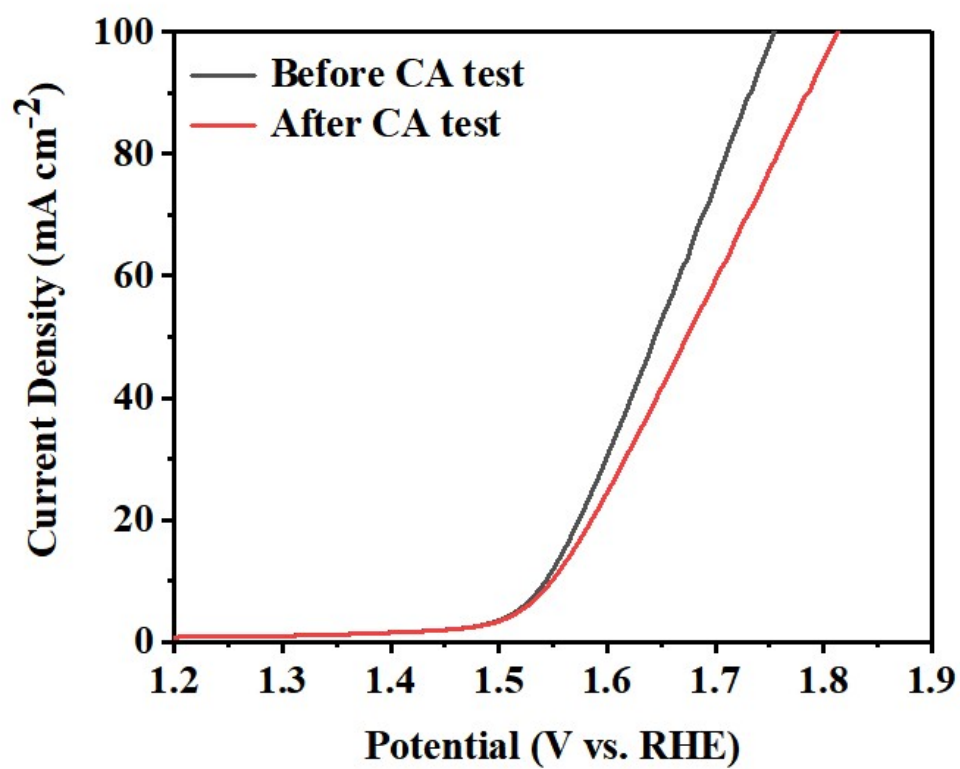

Figure S4. The LSV curve after CA test

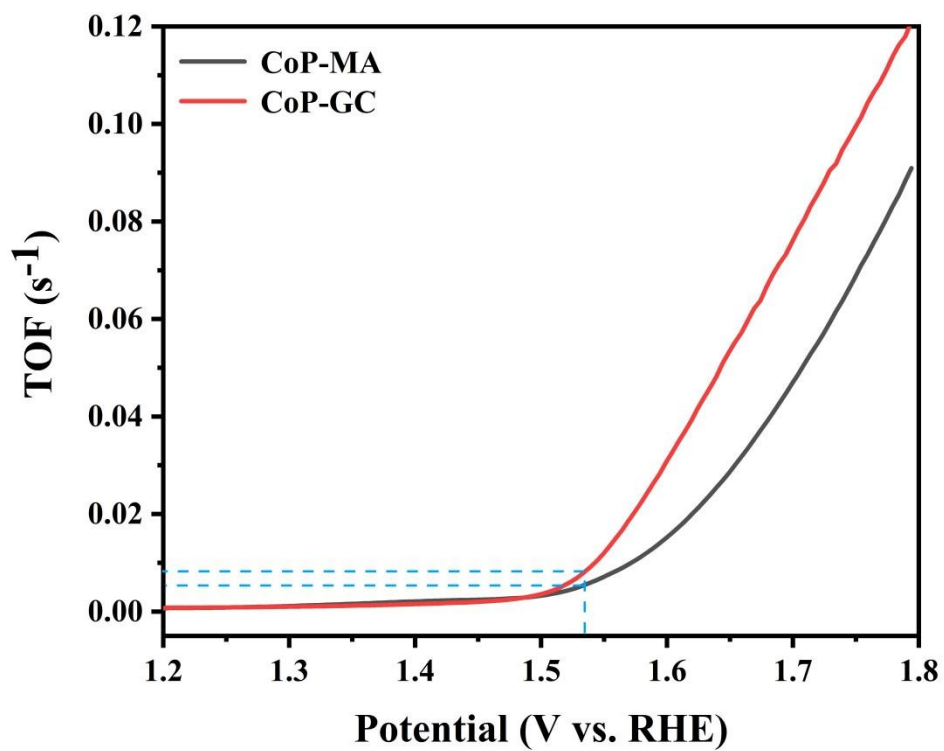

Figure S5. The turnover frequency of CoP-MA and CoP-GC

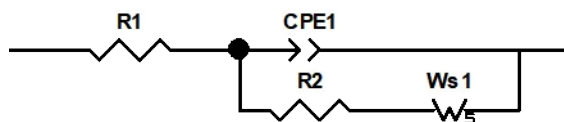

**Figure S6. The equivalent-circuit diagram of CoP-GC electrodes for EIS measurement**



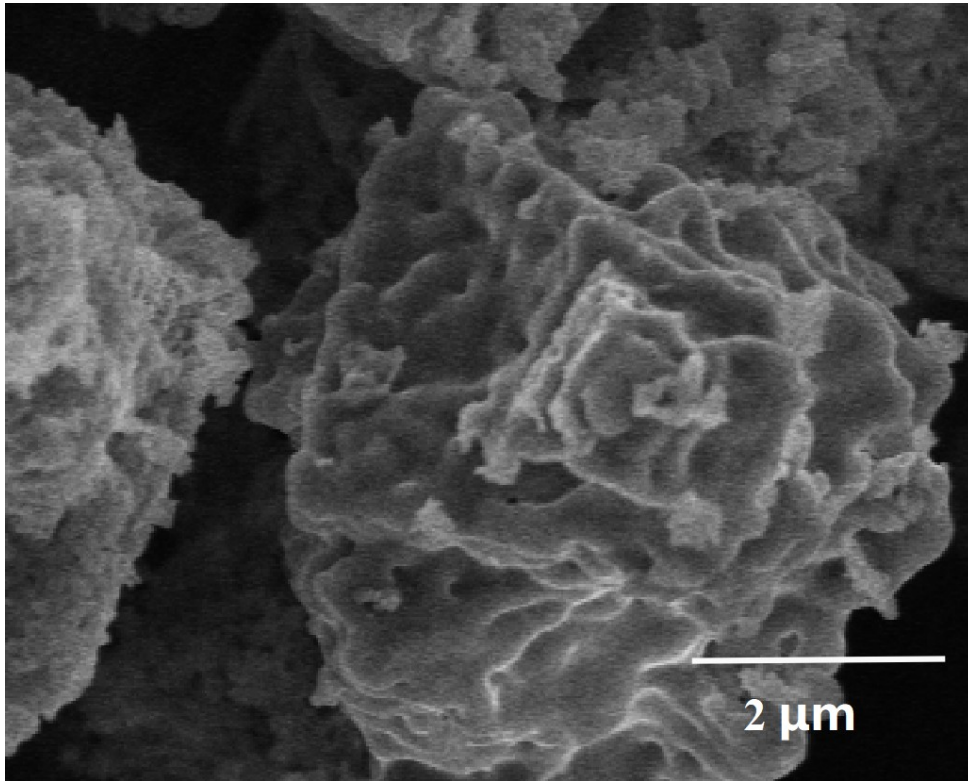

**Figure S7. SEM image of CoP-GC after the CA test for OER**

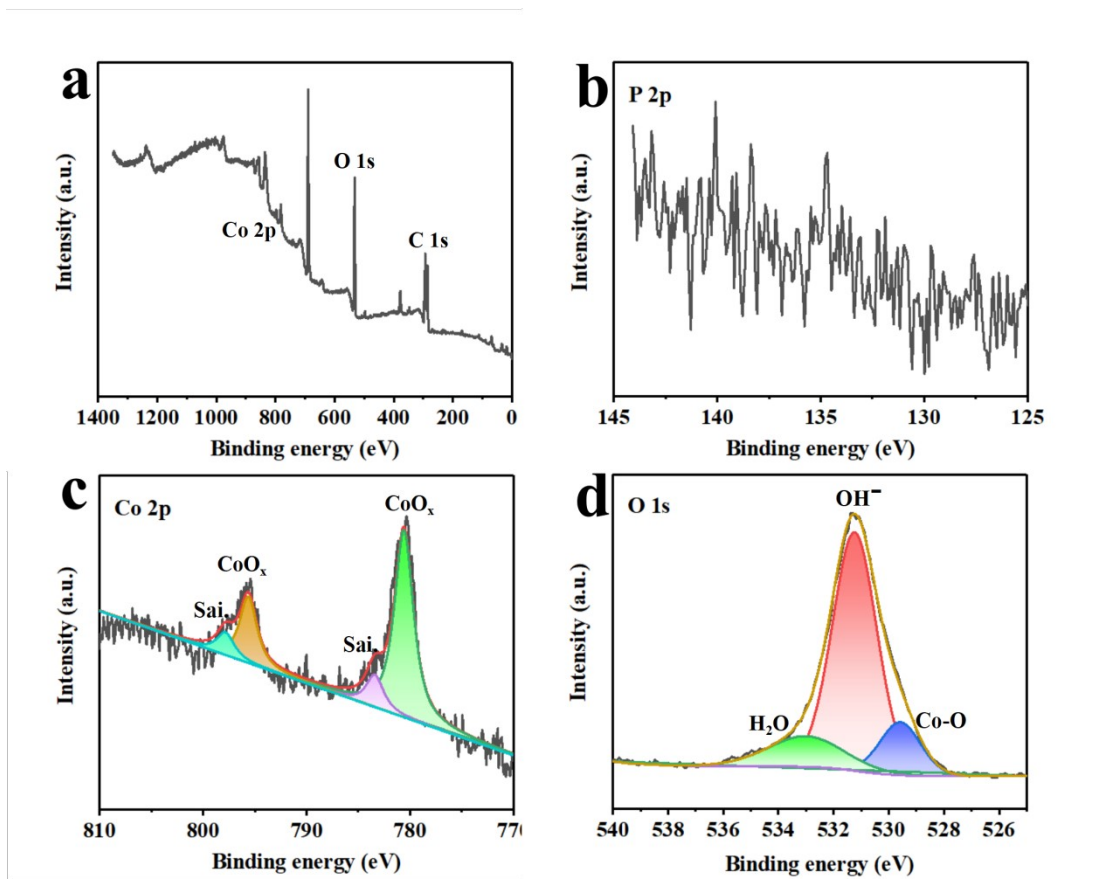

**Figure S8. XPS spectra of survey spectra (a), P 2p (b), Co 2p (c) and O 1s (d) of the CoP-GC after the OER stability tests**

**Table S1. OER performances comparison of reported cobalt-based electrocatalysts in alkaline electrolyte.**

| Electrocatalyst                    | Electrolyte | Loading (mg cm <sup>-2</sup> ) | Overpotential (mV) | Reference |
|------------------------------------|-------------|--------------------------------|--------------------|-----------|
| CoP-MA<br>CoP-GC                   | 1 M KOH     | 0.25                           | 340<br>310         | This work |
| CoO <sub>x</sub> -4h               | 1 M KOH     | 0.5                            | 306                | [1]       |
| CoO-MoO <sub>2</sub><br>Nanocages  | 1 M KOH     | 0.5                            | 312                | [2]       |
| CoP hollow<br>polyhedron           | 1 M KOH     | 0.102                          | 400                | [3]       |
| Needle-shaped<br>Co <sub>2</sub> P | 1 M KOH     | Not mention                    | 310                | [4]       |
| Co <sub>3</sub> FeP <sub>x</sub> O | 1 M KOH     | Not mention                    | 291                | [5]       |
| CoP-MNA                            | 1 M KOH     | 6.2                            | 290                | [6]       |
| CoP/NC                             | 1 M KOH     | 0.57                           | 343                | [7]       |
| hollow Fe-CoP<br>prisms            | 1 M KOH     | 1                              | 236                | [8]       |
| Fe-CoP nanocages                   | 1 M KOH     | Not mention                    | 300                | [9]       |
| Fe-NiCoP                           | 1 M KOH     | Not mention                    | 235                | [10]      |
| CoP <sub>x</sub> @CNS/NF           | 1 M KOH     | Not mention                    | 289                | [11]      |

## References

- [1] W. Xu, F. Lyu, Y. Bai, A. Gao, J. Feng, Z. Cai, Y. Yin, *Nano Energy*, 2018, **43**, 110-116.
- [2] F. Lyu, Y. Bai, Z. Li, W. Xu, Q. Wang, J. Mao, L. Wang, X. Zhang, Y. Yin, *Adv. Funct. Mater.* 2017, **27**, 1702324.
- [3] M. Liu, J. Li, *ACS Appl. Mater. Inter.* 2016, **8**, 2158-2165.
- [4] A. Dutta, A. K. Samantara, S. K. Dutta, B. K. Jena, N. Pradhan, *ACS Energy Lett.* 2016, **1**, 169-174.
- [5] D. D. Babu, Y. Huang, G. Anandhababu, M. A. Ghausi, Y. Wang, *ACS Appl. Mater. Inter.* 2017, **9**, 38621-38628.
- [6] Y. P. Zhu, Y. P. Liu, T. Z. Ren, Z. Y. Yuan, *Adv. Funct. Mater.* 2015, **25**, 7337-7347.
- [7] Z. Peng, Y. Yu, D. Jiang, Y. Wu, B. Y. Xia, *Carbon*. 2019, **144**, 464-471.
- [8] X. D. Ding, H. T. Huang, Q. Wan, X. Guan, Y. X. Fang, S. Lin, D. Y. Chen, Z. L. Xie, *J. Energy Chem.* 2021, **62**, 415-422.
- [9] J. Y. Xie, Z. Z. Liu, J. Li, L. Feng, M. Yang, Y. Ma, D. P. Liu, L. Wang, Y. M. Chai, B. Dong, *J. Energy Chem.* 2020, **48**, 328-333.
- [10] B. He, C. Q. Peng, F. Ye, H. W. Gao, Y. Wang, Y. W. Tang, Q. L. Hao, H. K. Liu, Z. Su, *CrystEngComm*, 2021, **23**, 3861-3869.
- [11] C. C. Hou, L. L. Zou, Y. Wang, Q. Xu, *Angew. Chem. Int. Ed.*, 2020, **59**, 21360.
